# Supplementary material for: Developing a toll-like receptor biosensor for Gram-positive bacterial detection and its storage strategies
Source: Royal Society of Chemistry journal article supplement (doi:10.1039/d0an01050b), 2020-01-01
Supplement: d0an01050b1.pdf [file d0an01050b1.pdf]

## Developing A Toll-like Receptor Biosensor for Gram-Positive Bacterial Detection and its Storage Strategies

Jennifer McLeod<sup>ab</sup>, Chankyu Park<sup>a</sup>, Alexandra Cunningham<sup>a</sup>, Lynne O'Donnell<sup>c</sup>, R. Stephen Brown<sup>abc</sup>, Fiona Kelly<sup>d</sup>, Zhe She<sup>ab\*</sup>

- a) Department of Chemistry, Queen's University, Kingston, ON K7L 3N6, Canada. Email: [zhe.she@queensu.ca](mailto:zhe.she@queensu.ca)
- b) Beaty Water Research Centre, Queen's University, Kingston, ON, K7L 3N6, Canada.
- c) School of Environmental Studies, Queen's University, Kingston, ON K7L 3N6, Canada.
- d) Department of Chemistry and Chemical Engineering, Royal Military College of Canada, PO Box 17000, Station Forces, Kingston, ON, K7K 7B4, Canada.

## Experimental Method

**Instrumentation.** Milli-Q (MQ) water (18.2 M $\Omega$ ·cm) was obtained from a Millipore Synthesis A10 Milli-Q water system. pH measurements were carried out on a Fisherbrand pH probe. DRP-C220AT DropSens screen printed electrodes and DRP-CAC (Model code) connectors were purchased from Metrohm AG (Herisau, Switzerland). Each DRP-C220AT DropSens chip contains a gold working electrode, a gold counter electrode, and Ag pseudo-reference electrode. The surface area of working electrode is 12.6 mm<sup>2</sup>. Electrochemical measurements were performed on a CHI6055E potentiostat purchased from CH Instruments (Austin, TX). All experiments were performed at room temperature under ambient conditions.

**Preparation of TLR 2/6 hybridized Sensor.** TLR sensors were prepared using DropSens gold screen printed electrode (SPE). 1-lipoic acid n-hydroxysuccinimide ester (LPA) was synthesized following a published protocol.<sup>1</sup> LPA solution at a concentration of 2 mM was prepared using ethanol/MQ water (volume ratio of 1:1). A clean plastic petri dish was lined with a filter paper which was dampened with a 1:1 solution of ethanol and MQ. The DropSens SPE was placed on the filter paper and 50  $\mu$ L of the 2 mM LPA solution was dropped onto the working electrode. The petri dish was sealed with parafilm and placed in a fridge at 4 °C for 24 hours. An additional 50  $\mu$ L of the 2 mM LPA solution was cast onto the working electrode and returned to the fridge for another 24 hours. After a total of 48 hours the SPE was rinsed thoroughly with ethanol and MQ water before being blown dry with nitrogen. TLR2 and TLR6 proteins were individually reconstituted into solutions at a concentration of 200  $\mu$ g/mL using PBS buffer (pH  $\sim$ 7.4). The TLR2/6 protein mixture was prepared by mixing 100  $\mu$ L of TLR2 and 100  $\mu$ L of TLR6 and vortexing for 30 seconds in a 1.5 mL microcentrifuge tube. The SPEs were placed in petri dishes with filter papers dampened with PBS buffer (pH  $\sim$ 7.4). A small drop of TLR 2/6 mixture (5  $\mu$ L) was dispensed onto each working electrode and then the petri dishes were sealed with parafilm and left in the fridge at 4 °C for 72 hours. The electrodes were rinsed with MQ water after the immersion and blown dried with nitrogen. An ethanolamine-tris buffer solution was prepared by dissolving 1.2 g of ethanolamine, 0.121 g tris(hydroxymethyl)aminomethane in 20 mL of MQ water. The pH of the solution was adjusted to 8.4 using concentrated hydrochloric acid. After the step of immobilizing TLR2/6 proteins, the electrode surfaces were immersed in ethanolamine solutions for 1 hour to deactivate the unreacted ester groups on the LPA monolayer.

**Electrochemical Measurements.** All electrochemical measurements were performed in Faraday cages using DRP-CAC adapters for the SPE's being measured. CV, SWV, and EIS measurements were completed using CHI6055E potentiostats. The measurements were carried out in 10 mM HEPES buffer solutions with 5 mM K<sub>4</sub>Fe(CN)<sub>6</sub> / 5 mM K<sub>3</sub>Fe(CN)<sub>6</sub> redox couple and 1 M NaClO<sub>4</sub> as the supporting electrolyte. CV measurements were carried out in a window between -350 and 450 mV using a scan rate of 0.1 V/s. SWV was performed by scanning from -100 mV to 700 mV with a frequency of 15 Hz. Open-circuit potentials were always used for EIS measurement, which were conducted in the frequency range of 100000 to 0.1 Hz with an amplitude of 5 mV. The experimental EIS curves were evaluated to determine the film resistance using ZSimpWin 2.0 software. The exposure times for Pam2CSK4 and bacterial whole-cell samples were 5 and 15 minutes respectively. CV, SWV and EIS were always collected before and after exposure the sensors to the analytes.

## Supporting Experimental Data

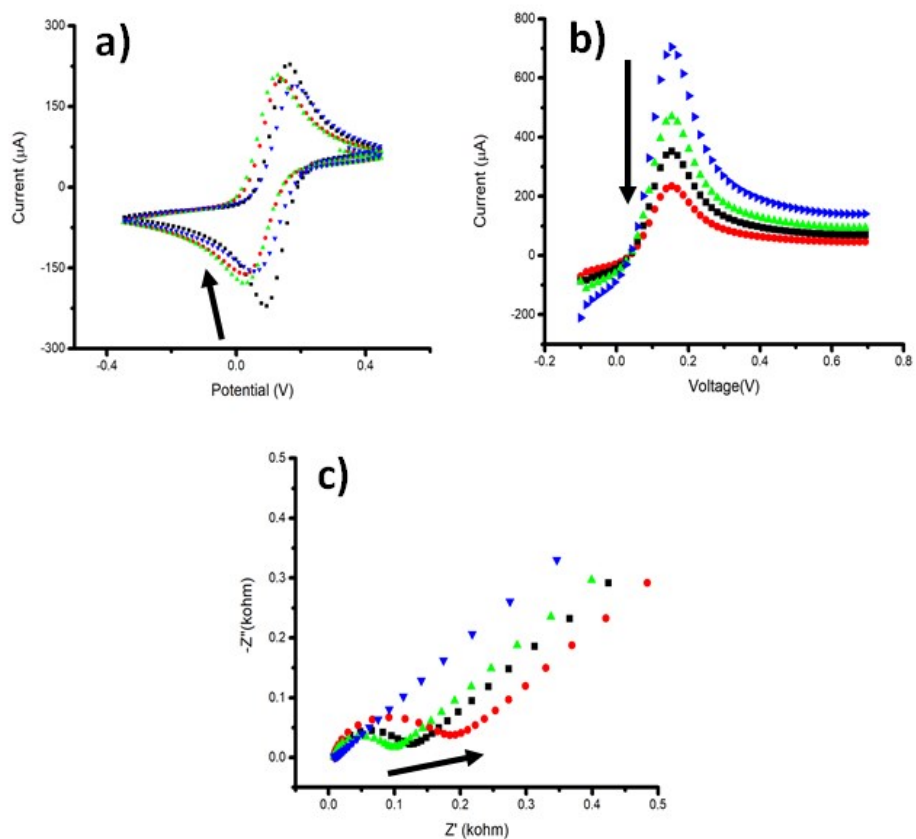

**Figure S1.** Characterization of sensor surfaces during preparation steps by (a) Cyclic voltammetry measuring bare gold surface ( $\blacksquare$ , black), surface after LPA modification ( $\blacktriangle$ , green), surface after TLR modification ( $\bullet$ , red), surface after blocking with ethanolamine ( $\blacktriangledown$ , blue) (b) Square wave voltammetry measuring bare gold surface ( $\blacktriangleright$ , blue), surface after LPA modification ( $\blacktriangle$ , green), surface after TLR modification ( $\blacksquare$ , black), surface after blocking with ethanolamine ( $\bullet$ , red), (c) Nyquist plot measuring bare gold surface ( $\blacktriangledown$ , blue), surface after LPA modification ( $\blacktriangle$ , green), surface after TLR modification ( $\blacksquare$ , black), surface after blocking with ethanolamine ( $\bullet$ , red). The arrow insets show- the trend of the changes in voltammograms and impedance plots.

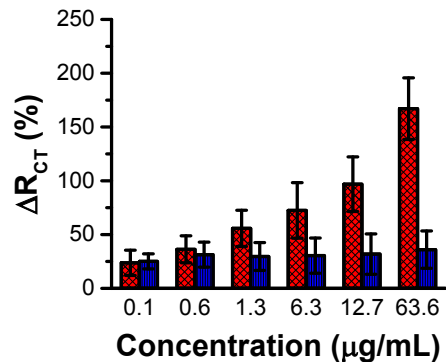

**Figure S2.** Comparison of TLR2/6 sensor responses to different concentrations of Pam2CSK4 (red, left bars), a Gram-positive bacterial PAMP, and *Salmonella* lipopolysaccharide (blue, right bars), a Gram-negative bacterial PAMP. The values are listed in **Table S1**.

| Concentration (μg/ml) | ΔRct (%) Pam2CSK4 | ΔRct (%) LPS |
|-----------------------|-------------------|--------------|
| 0.1                   | 24 ± 12 %         | 25 ± 7 %     |
| 0.6                   | 36 ± 13 %         | 31 ± 12 %    |
| 1.3                   | 56 ± 17 %         | 30 ± 13 %    |
| 6.3                   | 72 ± 26 %         | 30 ± 16 %    |
| 12.7                  | 97 ± 25 %         | 32 ± 19 %    |
| 63.6                  | 167 ± 29 %        | 36 ± 7 %     |

**Table S1.** TLR2/6 sensor responses to different concentrations of Pam2CSK4, a Gram-positive bacterial PAMP, and *Salmonella* lipopolysaccharide, a Gram-negative bacterial PAMP.

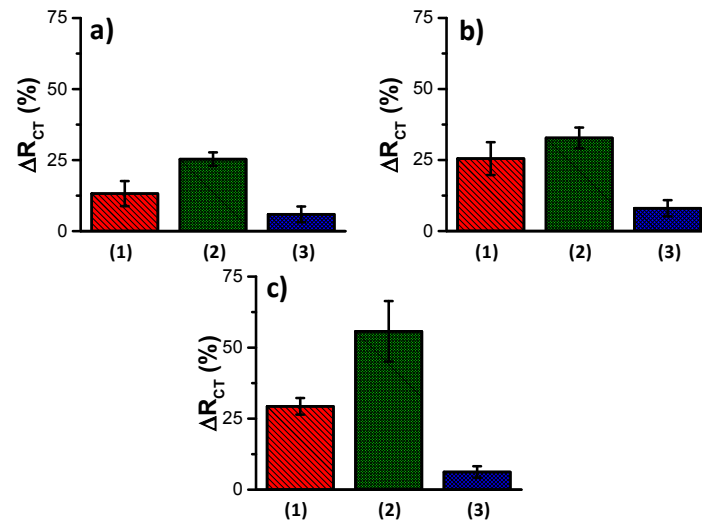

**Figure S3.** Plots of responses of TLR2/6 sensors to different strains of bacterial whole-cell cultures (1. *E. hirae* (ATCC 8043); 2. *B. licheniformis* (ATCC 12759); 3. *E. coli* (ATCC 25922)) with increasing concentration at a)  $10^2$  CFU/mL, b)  $10^4$  CFU/mL and c)  $10^6$  CFU/mL.

| Targeted PAMP and Analyte                          | LOD             | Bio-recognition element | Electrode type   | Readout method                         | Reference |
|----------------------------------------------------|-----------------|-------------------------|------------------|----------------------------------------|-----------|
| Triacylated lipopeptide                            | 7.5 µg/ml       | TLR1/TLR2               | Gold             | Electrochemical impedance spectroscopy | Ref. 2    |
| Poly(I:C)                                          | 60 ng/ml        | TLR3                    | Gold             | Electrochemical impedance spectroscopy | Ref. 3    |
| Lipopolysaccharide                                 | 0.0002 EU/mL    | TLR4                    | Gold             | Electrochemical impedance spectroscopy | Ref. 4    |
| Lipopolysaccharide                                 | 1 ng/mL         | TLR4                    | Gold             | Electrochemical impedance spectroscopy | Ref. 5    |
| <i>Salmonella typhimurium</i> (Lysed cell)         | 1 lysed cell/ml | TLR4                    | Gold             | Electrochemical impedance spectroscopy | Ref. 6    |
| Lipopolysaccharide                                 | 2 ng/ml         | TLR4                    | Indium Tin Oxide | Electrochemical impedance spectroscopy | Ref. 7    |
| Flagellin                                          | 3 ng/ml         | TLR5                    | Indium Tin Oxide | Electrochemical impedance spectroscopy | Ref. 7    |
| Diacylated lipopeptide                             | 100 nM          | TLR2/TLR6               | Gold             | Electrochemical impedance spectroscopy | This work |
| <i>Bacillus licheniformis</i> (whole-cell culture) | 100 cell/ml     | TLR2/TLR6               | Gold             | Electrochemical impedance spectroscopy | This work |

**Table S2.** Comparison of different electrochemical TLR sensors and their corresponding analytes.

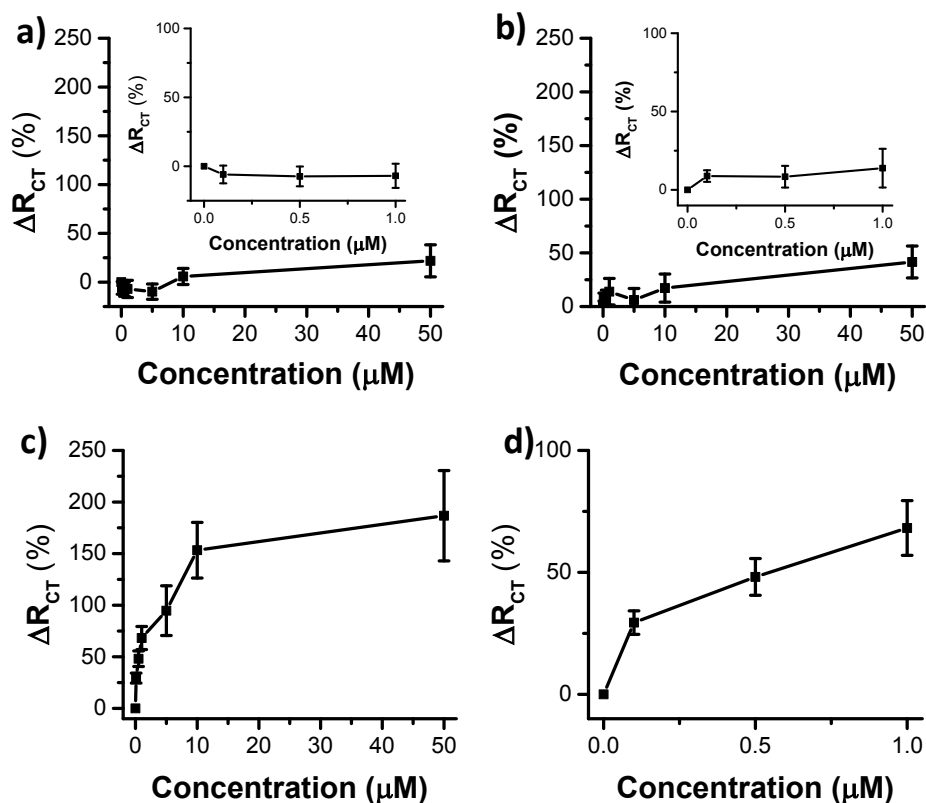

**Figure S4.** Calibration curves against different concentration of Pam2CSK4 obtained from TLR2/6 sensors stored under different conditions for 2 weeks: (a) 4 °C in PBS buffer, (b) -33 °C in 50 % v/v PBS/glycerol, (c & d) -80 °C PBS.

1. M. Howarth, W. H. Liu, S. Puthenveetil, Y. Zheng, L. F. Marshall, M. M. Schmidt, K. D. Wittrup, M. G. Bawendi and A. Y. Ting, *Nat. Methods*, 2008, **5**, 397-399.
2. Z. She, K. Topping, T. Ma, T. Zhao, W. Zhou, A. Kamal, S. Ahmadi and H.-B. Kraatz, *Anal. Chem.*, 2017, **89**, 4882-4888.
3. K. Amini, N. W. C. Chan and H.-B. Kraatz, *Anal. Methods*, 2014, **6**, 3322-3328.
4. T. Y. Yeo, J. S. Choi, B. K. Lee, B. S. Kim, H. I. Yoon, H. Y. Lee and Y. W. Cho, *Biosens. Bioelectron.*, 2011, **28**, 139-145.
5. R. M. Mayall, M. Renaud-Young, N. W. C. Chan and V. I. Birss, *Biosens. Bioelectron.*, 2017, **87**, 794-801.
6. R. M. Mayall, M. Renaud-Young, E. Gawron, S. Luong, S. Creager and V. I. Birss, *ACS Sensors*, 2019, **4**, 143-151.
7. D. Lin, K. D. Harris, N. W. C. Chan and A. B. Jemere, *Sens. Actuator B-Chem.*, 2018, **257**, 324-330.
